# Supplementary material for: Genotoxic stress and viral infection induce transient expression of APOBEC3A and pro-inflammatory genes through two distinct pathways
Source: PubMed Central journal article supplement (PMC8363607; doi:10.1038/s41467-021-25203-4), 2021-08-13
Supplement: 41467_2021_25203_MOESM3_ESM.pdf [file 41467_2021_25203_MOESM3_ESM.pdf]

## Description of Additional Supplementary Files

File Name: Supplementary Data 1

Description: **List of differentially expressed genes in BICR6 cells treated with 3p-hpRNA or HU+ATRI.** log<sub>2</sub>(fold change) and p-value (-log<sub>10</sub>) are indicated for each listed genes after indicated treatment. Colored p-values indicate genes with log<sub>2</sub>(fold change) >2. P-values were calculated for associated logistic regressions between gene expression levels and treatment condition using DESeq2 and P-values of genes expressed after both treatments are colored in red.
