# Supplementary material for: Genotoxic stress and viral infection induce transient expression of APOBEC3A and pro-inflammatory genes through two distinct pathways
Source: PubMed Central journal article supplement (PMC8363607; doi:10.1038/s41467-021-25203-4), 2021-08-13
Supplement: 41467_2021_25203_MOESM5_ESM.pdf [file 41467_2021_25203_MOESM5_ESM.pdf]

## Reporting Summary

Nature Research wishes to improve the reproducibility of the work that we publish. This form provides structure for consistency and transparency in reporting. For further information on Nature Research policies, see our [Editorial Policies](#) and the [Editorial Policy Checklist](#).

### Statistics

For all statistical analyses, confirm that the following items are present in the figure legend, table legend, main text, or Methods section.

n/a Confirmed

- The exact sample size ( $n$ ) for each experimental group/condition, given as a discrete number and unit of measurement
- A statement on whether measurements were taken from distinct samples or whether the same sample was measured repeatedly
- The statistical test(s) used AND whether they are one- or two-sided  
*Only common tests should be described solely by name; describe more complex techniques in the Methods section.*
- A description of all covariates tested
- A description of any assumptions or corrections, such as tests of normality and adjustment for multiple comparisons
- A full description of the statistical parameters including central tendency (e.g. means) or other basic estimates (e.g. regression coefficient) AND variation (e.g. standard deviation) or associated estimates of uncertainty (e.g. confidence intervals)
- For null hypothesis testing, the test statistic (e.g.  $F$ ,  $t$ ,  $r$ ) with confidence intervals, effect sizes, degrees of freedom and  $P$  value noted  
*Give  $P$  values as exact values whenever suitable.*
- For Bayesian analysis, information on the choice of priors and Markov chain Monte Carlo settings
- For hierarchical and complex designs, identification of the appropriate level for tests and full reporting of outcomes
- Estimates of effect sizes (e.g. Cohen's  $d$ , Pearson's  $r$ ), indicating how they were calculated

*Our web collection on [statistics for biologists](#) contains articles on many of the points above.*

### Software and code

Policy information about [availability of computer code](#)

**Data collection** qRT-PCR was performed in QuantStudio 3 (Applied Biosystems) using Applied Biosystems QuantStudio software. FACS data acquisition was performed on a NovoCyte Flow cytometer equipped with the NovoExpress software (ACEA Biosciences) Gel images were acquired using a Chemidoc MP (BioRad).

**Data analysis** Gel images were quantified with ImageLab 6.1 (Biorad). Graphs were generated using Prim 9 (GraphPad). FACS data analysis was performed using NovoExpress software (ACEA Biosciences)

For manuscripts utilizing custom algorithms or software that are central to the research but not yet described in published literature, software must be made available to editors and reviewers. We strongly encourage code deposition in a community repository (e.g. GitHub). See the Nature Research [guidelines for submitting code & software](#) for further information.

### Data

Policy information about [availability of data](#)

All manuscripts must include a [data availability statement](#). This statement should provide the following information, where applicable:

- Accession codes, unique identifiers, or web links for publicly available datasets
- A list of figures that have associated raw data
- A description of any restrictions on data availability

The source data underlying Figures 1 to 7, and Supplementary Figure 1 to 13 are provided as a Source Data file. All sequencing data were deposited in NCBI Sequence Read Archive, using the Bioproject Accession: PRJNA684601. A direct link can be found here: <https://www.ncbi.nlm.nih.gov/bioproject/?term=PRJNA684601>. Databases used in this study were: Stanford\_ChipSeq\_GM12878\_TNFa\_NFKB\_IgG-rab (<https://www.ncbi.nlm.nih.gov/geo/query/acc.cgi?acc=GSM935478>) and the human genome GRCh37/hg19 ([https://www.ncbi.nlm.nih.gov/assembly/GCF\\_000001405.13/](https://www.ncbi.nlm.nih.gov/assembly/GCF_000001405.13/)) and GRCh38/hg19 ([https://www.ncbi.nlm.nih.gov/assembly/GCF\\_000001405.24/](https://www.ncbi.nlm.nih.gov/assembly/GCF_000001405.24/))

## Field-specific reporting

Please select the one below that is the best fit for your research. If you are not sure, read the appropriate sections before making your selection.

- Life sciences     Behavioural & social sciences     Ecological, evolutionary & environmental sciences

For a reference copy of the document with all sections, see [nature.com/documents/nr-reporting-summary-flat.pdf](https://www.nature.com/documents/nr-reporting-summary-flat.pdf)

## Life sciences study design

All studies must disclose on these points even when the disclosure is negative.

|                 |                                                                                                                                                                                                                                                                                                                                                                                                                                        |
|-----------------|----------------------------------------------------------------------------------------------------------------------------------------------------------------------------------------------------------------------------------------------------------------------------------------------------------------------------------------------------------------------------------------------------------------------------------------|
| Sample size     | Sample sizes were chosen according to accepted standards in the field. Sample size was not pre-determined using statistics tools. As indicated in the figure legends, minimal size of analyzed biological samples was "3". Statistical analysis (as described in respective figure legends) was used to calculate statistical significance of obtained results. The individual p-values are indicated in figures or in figure legends. |
| Data exclusions | No data were excluded.                                                                                                                                                                                                                                                                                                                                                                                                                 |
| Replication     | All experiments have been repeated in multiple successfully independent experiments (3 times or more). All key experiments have been repeated in different cell lines.                                                                                                                                                                                                                                                                 |
| Randomization   | We had a limited number of biological samples. The analysis was self-normalized to the sample, so randomization of samples would not be a relevant method.                                                                                                                                                                                                                                                                             |
| Blinding        | As the analysis required comparisons against a known controls and knockdown targets were selected for their likely relevance to the biological pathway, blinding would not provide much reduction of potential bias in the analysis. However, performance and analyses of experiments were independently conducted by co-authors.                                                                                                      |

## Reporting for specific materials, systems and methods

We require information from authors about some types of materials, experimental systems and methods used in many studies. Here, indicate whether each material, system or method listed is relevant to your study. If you are not sure if a list item applies to your research, read the appropriate section before selecting a response.

### Materials & experimental systems

| n/a                                 | Involved in the study                                     |
|-------------------------------------|-----------------------------------------------------------|
| <input type="checkbox"/>            | <input checked="" type="checkbox"/> Antibodies            |
| <input type="checkbox"/>            | <input checked="" type="checkbox"/> Eukaryotic cell lines |
| <input checked="" type="checkbox"/> | <input type="checkbox"/> Palaeontology and archaeology    |
| <input checked="" type="checkbox"/> | <input type="checkbox"/> Animals and other organisms      |
| <input checked="" type="checkbox"/> | <input type="checkbox"/> Human research participants      |
| <input checked="" type="checkbox"/> | <input type="checkbox"/> Clinical data                    |
| <input checked="" type="checkbox"/> | <input type="checkbox"/> Dual use research of concern     |

### Methods

| n/a                                 | Involved in the study                              |
|-------------------------------------|----------------------------------------------------|
| <input type="checkbox"/>            | <input checked="" type="checkbox"/> ChIP-seq       |
| <input type="checkbox"/>            | <input checked="" type="checkbox"/> Flow cytometry |
| <input checked="" type="checkbox"/> | <input type="checkbox"/> MRI-based neuroimaging    |

## Antibodies

### Antibodies used

| Targets     | Species | Antibody types | Company and Catalogue number         | Antibody Dilution    |
|-------------|---------|----------------|--------------------------------------|----------------------|
| GAPDH       | Rabbit  | polyclonal     | EMD Millipore (#ABS16)               | 1:20,000 WB          |
| Ku70        | Mouse   | monoclonal     | GeneTex (#GTX70271; clone 1.5 )      | 1:5000 WB            |
| MDA5        | Rabbit  | monoclonal     | Cell signaling (#5321; clone D74E4)  | 1:1000 WB            |
| RIG-I       | Rabbit  | monoclonal     | Cell signaling (#3743; clone D14G6)  | 1:1000 WB            |
| STING       | Rabbit  | monoclonal     | Cell Signaling (#13647; clone 2P2F)  | 1:1000 WB            |
| APOBEC3A    | Rabbit  | monoclonal     | NIH-ARP (#12398; clone 5210-08-15)   | 1:1000 WB            |
| STAT1       | Mouse   | monoclonal     | Santa Cruz (#sc-464; clone C-136)    | 1:1000 WB            |
| STAT2       | Rabbit  | monoclonal     | Cell Signaling (#72604; clone D9J7L) | 1:1500 WB            |
| STAT3       | Rabbit  | polyclonal     | Bethyl (#A302-405A-T)                | 1:2000 WB            |
| STAT2-pY690 | Rabbit  | monoclonal     | Cell Signaling (#88410)              | 1:1500 WB            |
| STAT1-pY701 | Rabbit  | monoclonal     | Cell Signaling (#9167)               | 1:1000 WB            |
| γH2AX       | Mouse   | monoclonal     | EMD Millipore (#05-636; clone BW301) | 1:5000 WB; 1:1000 IF |
| CHK1-pS345  | Rabbit  | monoclonal     | Cell Signaling (#2348; clone 133D3)  | 1:1000 WB            |
| CHK1-pS317  | Rabbit  | polyclonal     | Cell Signaling (#2344)               | 1:1000 WB            |
| IRF3        | Rabbit  | monoclonal     | Cell Signaling (#11904; clone D6I4C) | 1:500 WB; 1:300 IF   |
| NFκB (p65)  | Mouse   | monoclonal     | Santa Cruz (#sc8008; clone F-6)      | 1:400 IF             |

NFκB (p65) Rabbit monoclonal Cell Signaling (#8242; clone D14E12) 1:2000 WB; 1:500 IF  
 IκBα Mouse monoclonal Cell Signaling (#4814; clone L35A5) 1:1000 WB  
 p53 Mouse monoclonal Santa Cruz (#sc-47698 ; clone DO-7) 1:500 WB  
 cGAS Rabbit monoclonal Cell Signaling (#15102 ; clone D1D3G) 1:1000 WB  
 Peroxidase-conjugated AffiniPure Goat Anti Rabbit (#111-035-003) or anti Mouse (#115-035-003) 1:10000 WB  
 Cy3 conjugated AffiniPure Goat Anti Rabbit (#111-165-003) or anti Mouse (#115-165-003) 1:600 IF  
 Alexa Fluor 488 conjugated AffiniPure Goat Anti Rabbit (#111-545-003) or anti Mouse (#115-545-003) 1:600 IF

## Validation

Antibodies specificity against RIG-I, MAVS, IRF3, STING, p53, p65, STAT2 were confirmed in this manuscript using knockout cell lines for the corresponding protein target. Antibodies specificity against A3A, cGAS, STAT1, STAT3, MDA5, IκBα were confirmed in this manuscript using cell lines knockdown with specific siRNA for the corresponding target. CHK1-pS317, CHK1-pS345, STAT2-pY690 and STAT1-pY701 antibodies were validated by the manufacturer for western blots and previous publications (PMID: 26365377 ; PMID: 28698210). Antibodies used for loading control (GAPDH and KU70) are validated by the manufacturer.

## Eukaryotic cell lines

### Policy information about cell lines

## Cell line source(s)

BICR6, RPE1-hTERT, PC-9, TPH-1, LLC-MK2 and MCF10A cell lines were purchased from either ATCC or Sigma-Aldrich. Knockout cell lines were derived from BICR6 or MCF10A cell lines as described in the method section.

## Authentication

All cell lines were obtained from commercial repositories (ATCC, Sigma Aldrich). Upon receipt, the cell lines were expanded and frozen stocks were created. Stocks were further authenticated as follows: To identify cross-contaminated or synonymous lines, a panel of SNPs was profiled for each cell line (Sequenom) and a pair-wise comparison score was calculated. In addition, we performed short tandem repeat (STR) analysis (AmpFLSTR Identifier, Applied Biosystems) and matched this to an existing STR profile generated by the providing repository. For the experiments described in this article, cell lines were not continuously kept in culture for more than 3 months.

## Mycoplasma contamination

All cell lines were tested repetitively for Mycoplasma contamination and all cell lines were tested negative for Mycoplasma

Commonly misidentified lines  
(See [ICLAC](#) register)

No commonly misidentified cell lines were used in the study

## ChIP-seq

### Data deposition

Confirm that both raw and final processed data have been deposited in a public database such as [GEO](#).

Confirm that you have deposited or provided access to graph files (e.g. BED files) for the called peaks.

## Data access links

*May remain private before publication.*

NCBI Sequence Read Archive, using the Bioproject Accession: PRJNA684601

## Files in database submission

Sequencing data for all ChIP-Seq

## Genome browser session

(e.g. [UCSC](#))

N/A

### Methodology

## Replicates

One replicates per condition were performed. Sequences and peaks of interest were confirmed by ChIP-qPCR in three independent experiments.

## Sequencing depth

Approx 25million reads/sample

## Antibodies

STAT2 Rabbit monoclonal, Cell Signaling (#72604)  
 NFκB (p65) Rabbit monoclonal, Cell Signaling (#8242)  
 Normal Rabbit IgG, Cell Signaling (#2729)

## Peak calling parameters

N/A

## Data quality

Raw read quality and filtering was performed using FastQC and Picard tools, respectively. ChIP peaks were then processed using HOMER with the default parameters.

## Software

Data collection and analysis were performed using HOMER tools, and Integrative Genomics Viewer was used for visualisation and panels.

### Plots

Confirm that:

- The axis labels state the marker and fluorochrome used (e.g. CD4-FITC).
- The axis scales are clearly visible. Include numbers along axes only for bottom left plot of group (a 'group' is an analysis of identical markers).
- All plots are contour plots with outliers or pseudocolor plots.
- A numerical value for number of cells or percentage (with statistics) is provided.

### Methodology

Sample preparation

BICR6 and MCF10A cell lines

Instrument

ACEA NovoCyte flow cytometer

Software

ACEA NovoExpress (data collection and analysis)

Cell population abundance

10,000 single cells were quantified. Single cells were identified and isolated by gating singulets in the plot Propidium Iodide Height intensity over Propidium Iodide Area intensity.

Gating strategy

Living cells were identified and isolated by a gate in the FSC/SSC plot. Then single cells were identified and isolated by gating singulets in the plot Propidium Iodide Height intensity over Propidium Iodide Area intensity. Finally G1, S and G2/M gates were drawn on the plot representing EdU Area intensity over Propidium Iodide Area intensity.

- Tick this box to confirm that a figure exemplifying the gating strategy is provided in the Supplementary Information.
